# Supplementary material
Source: HighWire-hosted journal article supplement (https://svn.smart01.highwire.org/content/9/4/399)
Supplement: inline-supplementary-material-2 [file inline-supplementary-material-2.pdf]

**Checklist 1: Polygenic Risk Score Reporting Standards (PRS-RS) Checklist**

| Manuscript Section               | PRS-RS Item                                    |                                          | Page       |
|----------------------------------|------------------------------------------------|------------------------------------------|------------|
| Introduction                     | Study Type                                     |                                          | 4          |
|                                  | Risk Model Purpose & Predicted Outcome         |                                          | 4          |
| Methods                          | Participants                                   | Study Design & Recruitment               | 5          |
|                                  |                                                | Demographic and Clinical Characteristics | 5          |
|                                  |                                                | Ancestry                                 | 5          |
|                                  | Outcome of interest                            |                                          | 7-8        |
|                                  | Non-Genetic Variables                          |                                          | 6          |
|                                  | Genetic data                                   |                                          | 6-7        |
|                                  | Polygenic Risk Score Construction & Estimation |                                          | 7          |
|                                  | Integrated Risk Model                          | Model Type                               | 9          |
|                                  |                                                | Model Fitting                            | 9          |
|                                  | Missing Data                                   |                                          | 6-7        |
|                                  | Statistical Methods                            |                                          | 8-9        |
| Other Analyses                   |                                                | N/A                                      |            |
| Results                          | Participants                                   | Demographic and Clinical Characteristics | 10-11      |
|                                  |                                                | Ancestry                                 | 10         |
|                                  | PRS Distribution                               |                                          | eFigure 2  |
|                                  | Risk Model Predictive Ability                  |                                          | 11-12      |
|                                  | Risk Model Discrimination                      |                                          | 11-12      |
|                                  | Risk Model Calibration                         |                                          | N/A        |
|                                  | Subgroup Analyses                              |                                          | 11         |
| Discussion                       | Risk Model Interpretation                      |                                          | 14         |
|                                  | Limitations                                    |                                          | 15         |
|                                  | Generalizability                               |                                          | 13-14      |
|                                  | Risk Model Intended Uses                       |                                          | N/A        |
| Transparency and Reproducibility | Data Availability                              |                                          | Title page |
|                                  | Funding                                        |                                          | Title page |

N/A=not applicable. This checklist was from the Supplemental Table 4 of Wand H, et al. *Nature* 2021.

**Checklist 2: STROBE Statement – cohort studies**

|                              | <b>Item</b> | <b>Recommendation</b>                                                                                                                                                                             | <b>Page</b> |
|------------------------------|-------------|---------------------------------------------------------------------------------------------------------------------------------------------------------------------------------------------------|-------------|
| <b>Title and abstract</b>    | 1           | (a) Indicate the study's design with a commonly used term in the title or the abstract                                                                                                            | 1           |
|                              |             | (b) Provide in the abstract an informative and balanced summary of what was done and what was found                                                                                               | 1-2         |
| <b>Introduction</b>          |             |                                                                                                                                                                                                   |             |
| Background/rationale         | 2           | Explain the scientific background and rationale for the investigation being reported                                                                                                              | 4           |
| Objectives                   | 3           | State specific objectives, including any prespecified hypotheses                                                                                                                                  | 4           |
| <b>Methods</b>               |             |                                                                                                                                                                                                   |             |
| Study design                 | 4           | Present key elements of study design early in the paper                                                                                                                                           | 5-6         |
| Setting                      | 5           | Describe the setting, locations, and relevant dates, including periods of recruitment, exposure, follow-up, and data collection                                                                   | 5           |
| Participants                 | 6           | (a) Give the eligibility criteria, and the sources and methods of selection of participants. Describe methods of follow-up                                                                        | 5,7         |
|                              |             | (b) For matched studies, give matching criteria and number of exposed and unexposed                                                                                                               | N/A         |
| Variables                    | 7           | Clearly define all outcomes, exposures, predictors, potential confounders, and effect modifiers. Give diagnostic criteria, if applicable                                                          | 5-9         |
| Data sources/<br>measurement | 8*          | For each variable of interest, give sources of data and details of methods of assessment (measurement). Describe comparability of assessment methods if there is more than one group              | N/A         |
| Bias                         | 9           | Describe any efforts to address potential sources of bias                                                                                                                                         | 8-9         |
| Study size                   | 10          | Explain how the study size was arrived at                                                                                                                                                         | 5           |
| Quantitative variables       | 11          | Explain how quantitative variables were handled in the analyses. If applicable, describe which groupings were chosen and why                                                                      | 8-9         |
| Statistical methods          | 12          | (a) Describe all statistical methods, including those used to control for confounding                                                                                                             | 8-9         |
|                              |             | (b) Describe any methods used to examine subgroups and interactions                                                                                                                               | 9           |
|                              |             | (c) Explain how missing data were addressed                                                                                                                                                       | N/A         |
|                              |             | (d) If applicable, explain how loss to follow-up was addressed                                                                                                                                    | 7-8         |
|                              |             | (e) Describe any sensitivity analyses                                                                                                                                                             | 11          |
| <b>Results</b>               |             |                                                                                                                                                                                                   |             |
| Participants                 | 13*         | (a) Report numbers of individuals at each stage of study—eg numbers potentially eligible, examined for eligibility, confirmed eligible, included in the study, completing follow-up, and analysed | 10-11       |
|                              |             | (b) Give reasons for non-participation at each stage                                                                                                                                              | N/A         |
|                              |             | (c) Consider use of a flow diagram                                                                                                                                                                | Fig. 1      |
| Descriptive data             | 14*         | (a) Give characteristics of study participants (eg demographic, clinical, social) and information on exposures and potential confounders                                                          | Table2      |
|                              |             | (b) Indicate number of participants with missing data for each variable of interest                                                                                                               | N/A         |
|                              |             | (c) Summarise follow-up time (eg, average and total amount)                                                                                                                                       | 10          |
| Outcome data                 | 15*         | Report numbers of outcome events or summary measures over time                                                                                                                                    | 10-11       |

|                          |    |                                                                                                                                                                                                                                                                                                                                                                                                               |                           |
|--------------------------|----|---------------------------------------------------------------------------------------------------------------------------------------------------------------------------------------------------------------------------------------------------------------------------------------------------------------------------------------------------------------------------------------------------------------|---------------------------|
| Main results             | 16 | (a) Give unadjusted estimates and, if applicable, confounder-adjusted estimates and their precision (eg, 95% confidence interval). Make clear which confounders were adjusted for and why they were included<br>(b) Report category boundaries when continuous variables were categorized<br>(c) If relevant, consider translating estimates of relative risk into absolute risk for a meaningful time period | eTable5<br><br>N/A<br>N/A |
| Other analyses           | 17 | Report other analyses done—eg analyses of subgroups and interactions, and sensitivity analyses                                                                                                                                                                                                                                                                                                                | 11                        |
| <b>Discussion</b>        |    |                                                                                                                                                                                                                                                                                                                                                                                                               |                           |
| Key results              | 18 | Summarise key results with reference to study objectives                                                                                                                                                                                                                                                                                                                                                      | 13                        |
| Limitations              | 19 | Discuss limitations of the study, taking into account sources of potential bias or imprecision. Discuss both direction and magnitude of any potential bias                                                                                                                                                                                                                                                    | 15                        |
| Interpretation           | 20 | Give a cautious overall interpretation of results considering objectives, limitations, multiplicity of analyses, results from similar studies, and other relevant evidence                                                                                                                                                                                                                                    | 16                        |
| Generalisability         | 21 | Discuss the generalisability (external validity) of the study results                                                                                                                                                                                                                                                                                                                                         | 13-14                     |
| <b>Other information</b> |    |                                                                                                                                                                                                                                                                                                                                                                                                               |                           |
| Funding                  | 22 | Give the source of funding and the role of the funders for the present study and, if applicable, for the original study on which the present article is based                                                                                                                                                                                                                                                 | Title page                |

\*Give information separately for exposed and unexposed groups.
